# Supplementary material
Source: PubMed Central journal article supplement (PMC2268174)

A

DC

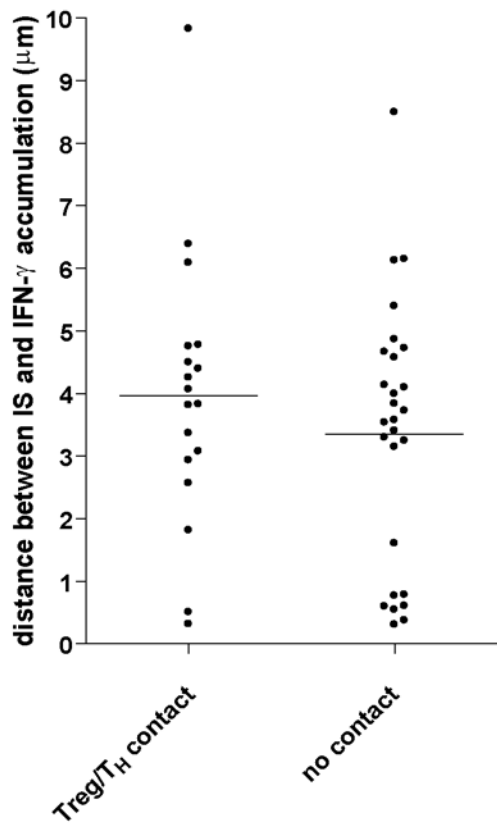

B

B-EBV

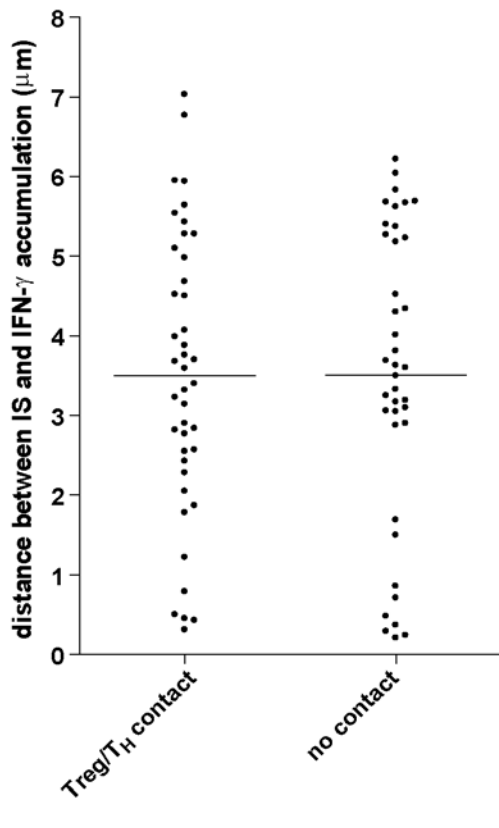

Supplement: supp_0708350105_08350Fig11.pdf [file supp_0708350105_08350Fig11.pdf]

**A**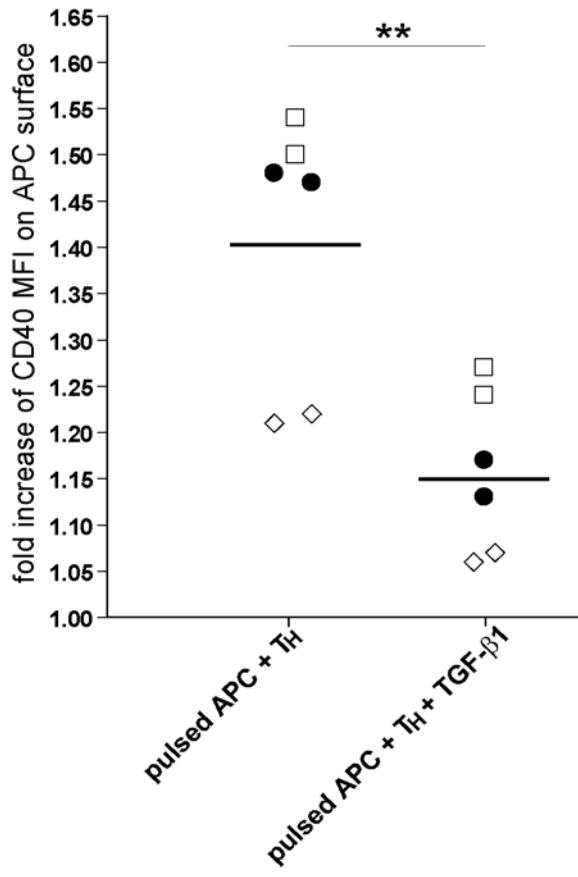**B**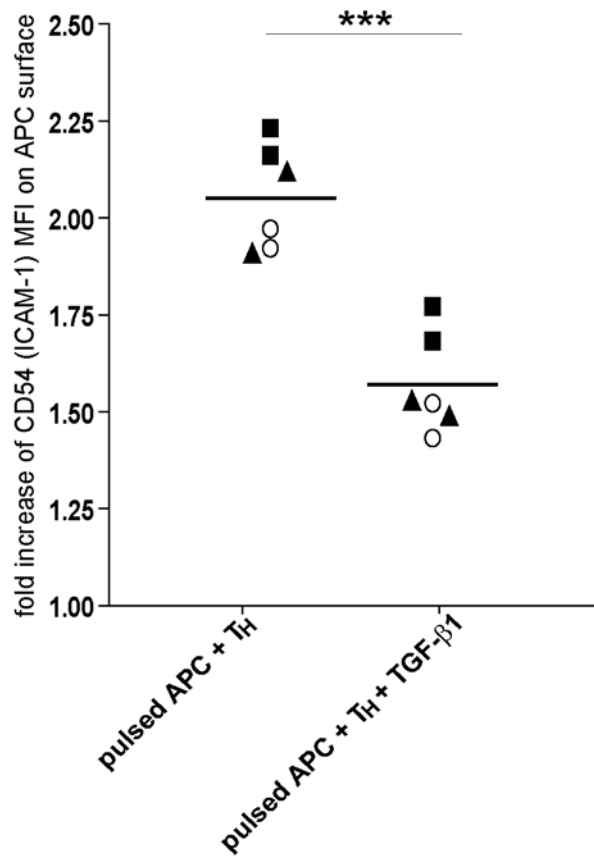

Supplement: supp_0708350105_08350Fig12.pdf [file supp_0708350105_08350Fig12.pdf]

**A**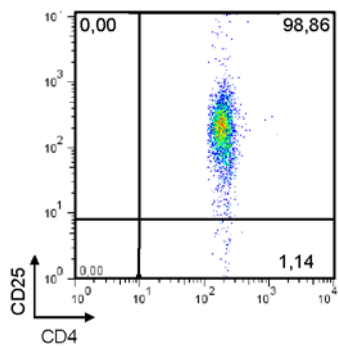**B**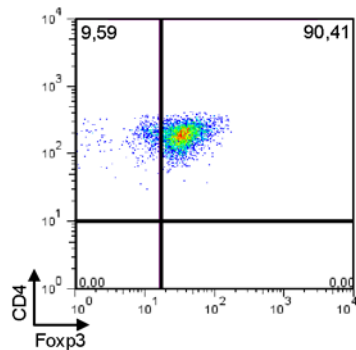**C**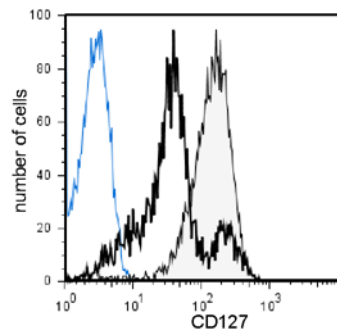**D**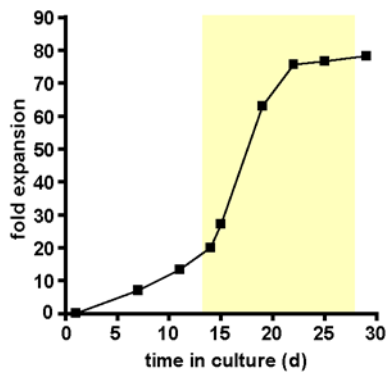**E**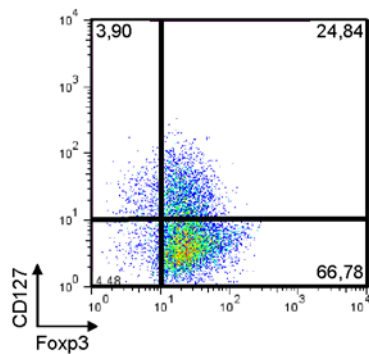**F**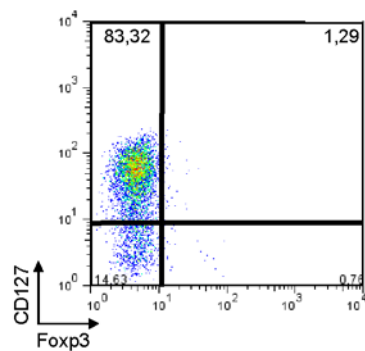**G**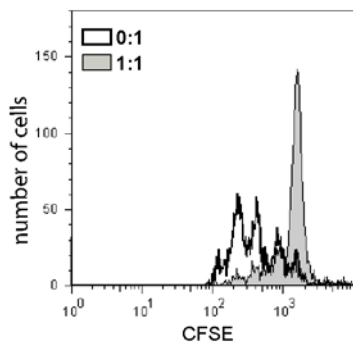**H**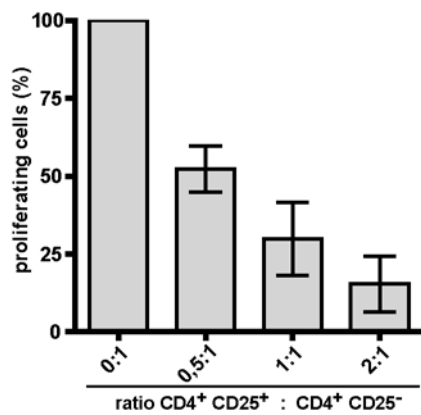

Supplement: supp_0708350105_08350Fig6.pdf [file supp_0708350105_08350Fig6.pdf]

**Figure S3.**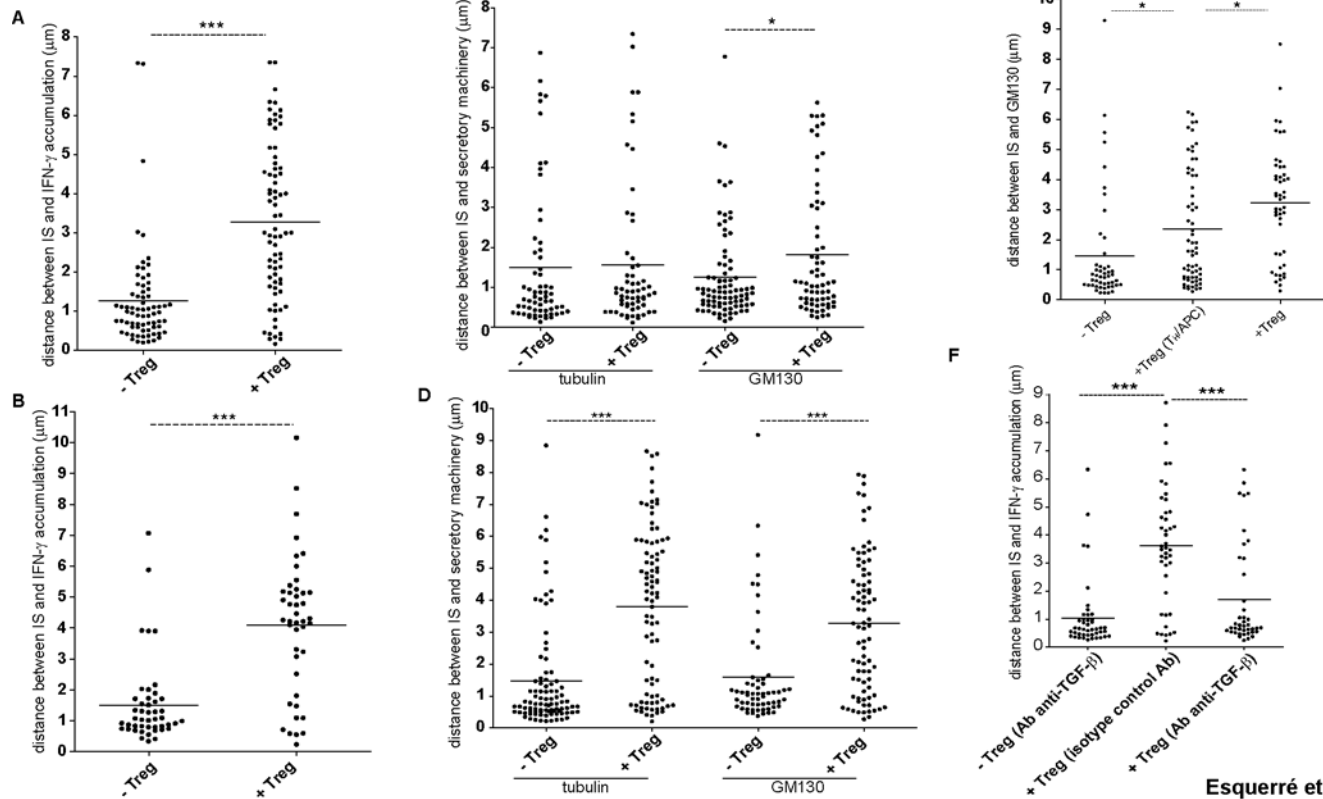

Supplement: supp_0708350105_08350Fig8.pdf [file supp_0708350105_08350Fig8.pdf]

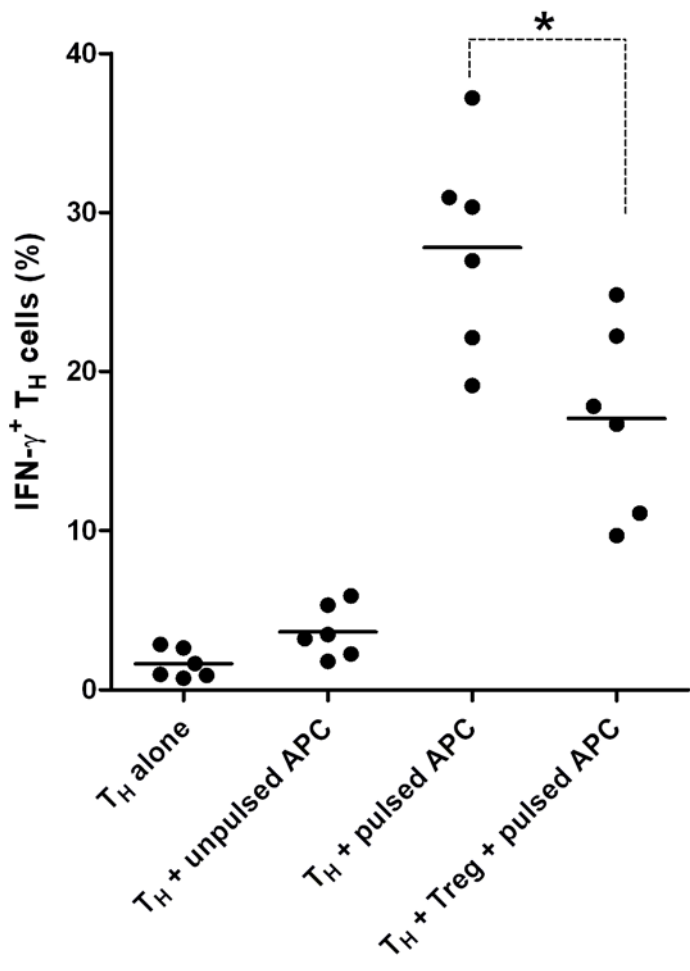

Supplement: supp_0708350105_08350Fig9.pdf [file supp_0708350105_08350Fig9.pdf]
